# Supplementary material for: Low-dose metformin targets the lysosomal AMPK pathway through PEN2
Source: PubMed Central journal article supplement (PMC8891018; doi:10.1038/s41586-022-04431-8), 2022-02-23
Supplement: 41586_2022_4431_MOESM6_ESM.pdf [file 41586_2022_4431_MOESM6_ESM.pdf]

**Supplementary Table 3 | Summary of life span analysis for PEN2 and ATP6AP1 worms<sup>a,b</sup>** Values of mean lifespan and median lifespan, and numbers of worms counted (total, deaths and censored) in each lifespan experiments are shown. See also statistical analysis data (*P* values calculated by Mantel-CoX) comparing the lifespan of worms between different phenotypes treated with metformin.

| Genotypes/<br>treatments      | Mean life span (days)           |                         |             | Median life span (days)         |                         |             | N <sup>c</sup> | N <sup>d</sup> | N <sup>e</sup> | P-value Vs<br>saline control<br>within each<br>genotype<br>(Mantel-CoX) |
|-------------------------------|---------------------------------|-------------------------|-------------|---------------------------------|-------------------------|-------------|----------------|----------------|----------------|-------------------------------------------------------------------------|
|                               | Estimated life<br>span ± s.e.m. | 95% confidence interval |             | Estimated life<br>span ± s.e.m. | 95% confidence interval |             |                |                |                |                                                                         |
|                               |                                 | Lower bound             | Upper bound |                                 | Lower bound             | Upper bound |                |                |                |                                                                         |
| <b>Fig. 4g</b>                |                                 |                         |             |                                 |                         |             |                |                |                |                                                                         |
| Ctrl                          | 18.468 ± 0.338                  | 17.805                  | 19.132      | 18.000 ± 0.590                  | 16.844                  | 19.156      | 243            | 57             | 300            | N/A                                                                     |
| Ctrl + Met                    | 26.077 ± 0.425                  | 25.243                  | 26.911      | 26.000 ± 0.417                  | 25.183                  | 26.817      | 201            | 49             | 250            | <0.001                                                                  |
| siPEN2                        | 15.482 ± 0.320                  | 14.854                  | 16.111      | 16.000 ± 0.298                  | 15.416                  | 16.584      | 199            | 51             | 250            | N/A                                                                     |
| siPEN2 + Met                  | 16.382 ± 0.336                  | 15.723                  | 17.041      | 16.000 ± 0.383                  | 15.249                  | 16.751      | 198            | 52             | 250            | 0.037                                                                   |
| <b>Fig. 4h</b>                |                                 |                         |             |                                 |                         |             |                |                |                |                                                                         |
| FL                            | 21.968 ± 0.484                  | 21.019                  | 22.917      | 22.000 ± 0.474                  | 21.071                  | 22.929      | 122            | 78             | 200            | N/A                                                                     |
| FL + Met                      | 29.000 ± 0.529                  | 27.962                  | 30.038      | 30.000 ± 0.488                  | 29.043                  | 30.957      | 160            | 40             | 200            | <0.001                                                                  |
| Δ420-440                      | 21.190 ± 0.390                  | 20.425                  | 21.955      | 22.000 ± 0.488                  | 21.043                  | 22.957      | 137            | 63             | 200            | N/A                                                                     |
| Δ420-440 + Met                | 20.923 ± 0.375                  | 20.189                  | 21.657      | 22.000 ± 0.423                  | 21.171                  | 22.829      | 163            | 37             | 200            | 0.793                                                                   |
| <b>Extended Data Fig. 13a</b> |                                 |                         |             |                                 |                         |             |                |                |                |                                                                         |
| Saline                        | 19.081 ± 0.466                  | 18.168                  | 19.994      | 18.000 ± 0.788                  | 16.456                  | 19.544      | 164            | 41             | 205            | N/A                                                                     |
| 10 mM Met                     | 20.284 ± 0.475                  | 19.353                  | 21.215      | 20.000 ± 0.617                  | 18.790                  | 21.210      | 166            | 34             | 200            | 0.104                                                                   |
| 25 mM Met                     | 19.648 ± 0.435                  | 18.796                  | 20.501      | 20.000 ± 0.515                  | 18.990                  | 21.010      | 147            | 53             | 200            | 0.636                                                                   |
| 50 mM Met                     | 25.611 ± 0.530                  | 24.572                  | 26.649      | 28.000 ± 0.461                  | 27.097                  | 28.903      | 157            | 43             | 200            | <0.001                                                                  |
| <b>Extended Data Fig. 14d</b> |                                 |                         |             |                                 |                         |             |                |                |                |                                                                         |
| Saline                        | 18.788 ± 0.415                  | 17.975                  | 19.601      | 18.000 ± 0.751                  | 16.527                  | 19.473      | 156            | 44             | 200            | N/A                                                                     |
| Met                           | 26.220 ± 0.450                  | 25.337                  | 27.102      | 28.000 ± 0.473                  | 27.013                  | 28.927      | 155            | 45             | 200            | <0.001                                                                  |
| Rotenone                      | 26.989 ± 0.537                  | 25.937                  | 28.041      | 28.000 ± 0.494                  | 27.032                  | 28.958      | 157            | 43             | 200            | <0.001                                                                  |
| Met + NAC                     | 18.501 ± 0.401                  | 17.715                  | 19.288      | 20.000 ± 0.619                  | 18.786                  | 21.214      | 159            | 41             | 200            | 0.494                                                                   |
| Rotenone + NAC                | 18.490 ± 0.439                  | 17.629                  | 19.531      | 18.000 ± 0.664                  | 16.698                  | 19.302      | 159            | 41             | 200            | 0.786                                                                   |
| <b>Extended Data Fig. 14e</b> |                                 |                         |             |                                 |                         |             |                |                |                |                                                                         |
| Saline                        | 14.133 ± 0.313                  | 13.520                  | 14.747      | 14.000 ± 0.390                  | 13.236                  | 14.764      | 83             | 17             | 100            | N/A                                                                     |
| Met                           | 13.910 ± 0.279                  | 13.363                  | 14.457      | 14.000 ± 0.380                  | 13.244                  | 14.756      | 91             | 9              | 100            | 0.465                                                                   |

<sup>a</sup>Independent repeats of each life span experiment were performed. Data from representative experiments are shown.

<sup>b</sup>Life span data sets within each panel of this table were done in parallel and statistical analyses was done within the data set.

<sup>c</sup>Number of worms scored (death events).

<sup>d</sup>Number of worms censored.

<sup>e</sup>Total number of worms.
